# Supplementary material for: Patient-reported Outcomes after ADM-assisted Implant-based Breast Reconstruction: A Cross-sectional Study
Source: PubMed Central journal article supplement — Plast Reconstr Surg Glob Open. 2018 Feb 8;6(2):e1654. doi: 10.1097/GOX.0000000000001654 (PMC5865927; doi:10.1097/gox.0000000000001654), 2018-02-08
Supplement: gox-6-e1654-s001.pdf [file gox-6-e1654-s001.pdf]

**SDC 1 - Spearman's correlation between BREAST-Q modules**

|            |                                           | <b>Q1</b> | <b>Q2a</b>      | <b>Q2b</b>             | <b>Q3</b>              | <b>Q4</b>              | <b>Q5</b>              | <b>Q6</b>       | <b>Q10</b>     | <b>Q11</b>             | <b>Q12</b>      | <b>Q13</b>      | <b>Q14</b>      |
|------------|-------------------------------------------|-----------|-----------------|------------------------|------------------------|------------------------|------------------------|-----------------|----------------|------------------------|-----------------|-----------------|-----------------|
| <b>Q1</b>  | Satisfaction with breasts                 | -         | 0.502<br><0.001 | 0.494<br><0.001        | <b>0.704</b><br><0.001 | <b>0.748</b><br><0.001 | <b>0.717</b><br><0.001 | 0.446<br><0.001 | 0.278<br>0.013 | <b>0.652</b><br><0.001 | 0.677<br><0.001 | 0.343<br><0.001 | 0.374<br><0.001 |
| <b>Q2a</b> | Visibility of rippling                    | n=204     | -               | <b>0.733</b><br><0.001 | 0.479<br><0.001        | 0.465<br><0.001        | 0.410<br><0.001        | 0.273<br>0.001  | 0.280<br>0.013 | 0.442<br><0.001        | 0.398<br><0.001 | 0.201<br>0.006  | 0.270<br>0.002  |
| <b>Q2b</b> | Sensation of rippling                     | n=204     | n=204           | -                      | 0.479<br><0.001        | 0.409<br><0.001        | 0.452<br><0.001        | 0.297<br><0.001 | 0.262<br>0.021 | 0.443<br><0.001        | 0.386<br><0.001 | 0.200<br>0.007  | 0.309<br><0.001 |
| <b>Q3</b>  | Satisfaction with outcome                 | n=205     | n=204           | n=204                  | -                      | <b>0.687</b><br><0.001 | 0.591<br><0.001        | 0.414<br><0.001 | 0.349<br>0.002 | <b>0.668</b><br><0.001 | 0.588<br><0.001 | 0.343<br><0.001 | 0.359<br><0.001 |
| <b>Q4</b>  | Psychosocial well-being                   | n=203     | n=202           | n=202                  | n=203                  | -                      | <b>0.752</b><br><0.001 | 0.533<br><0.001 | 0.340<br>0.002 | 0.542<br><0.001        | 0.519<br><0.001 | 0.296<br>0.001  | 0.322<br><0.001 |
| <b>Q5</b>  | Sexual well-being                         | n=192     | n=191           | n=191                  | n=192                  | n=191                  | -                      | 0.431<br><0.001 | 0.281<br>0.015 | 0.506<br><0.001        | 0.492<br><0.001 | 0.278<br><0.001 | 0.341<br><0.001 |
| <b>Q6</b>  | Physical well-being: chest and upper body | n=198     | n=197           | n=197                  | n=198                  | n=197                  | n=188                  | -               | 0.252<br>0.025 | 0.391<br><0.001        | 0.451<br><0.001 | 0.261<br><0.001 | 0.225<br>0.002  |
| <b>Q10</b> | Satisfaction with                         | n=79      | n=78            | n=78                   | n=79                   | n=78                   | n=75                   | n=79            | -              | 0.211                  | 0.147           | 0.039           | 0.030           |

|            |                                              |       |       |       |       |       |       |       |      |       |              |        |        |
|------------|----------------------------------------------|-------|-------|-------|-------|-------|-------|-------|------|-------|--------------|--------|--------|
|            | nipples                                      |       |       |       |       |       |       |       |      | 0.071 | 0.212        | 0.745  | 0.808  |
| <b>Q11</b> | Satisfaction with care regarding information | n=190 | n=189 | n=189 | n=190 | n=189 | n=181 | n=190 | n=74 | -     | <b>0.654</b> | 0.377  | 0.360  |
|            |                                              |       |       |       |       |       |       |       |      |       | <0.001       | <0.001 | <0.001 |
| <b>Q12</b> | Satisfaction with surgeon                    | n=189 | n=188 | n=188 | n=189 | n=189 | n=180 | n=189 | n=74 | n=190 | -            | 0.480  | 0.490  |
|            |                                              |       |       |       |       |       |       |       |      |       |              | <0.001 | <0.001 |
| <b>Q13</b> | Satisfaction with the medical team           | n=185 | n=184 | n=184 | n=184 | n=185 | n=176 | n=185 | n=71 | n=185 | n=185        | -      | 0.431  |
|            |                                              |       |       |       |       |       |       |       |      |       |              |        | <0.001 |
| <b>Q14</b> | Satisfaction with office staff               | n=184 | n=183 | n=183 | n=184 | n=183 | n=176 | n=184 | n=70 | n=184 | n=184        | n=181  | -      |
