# Supplementary material for: Patient-reported Outcomes after ADM-assisted Implant-based Breast Reconstruction: A Cross-sectional Study
Source: PubMed Central journal article supplement — Plast Reconstr Surg Glob Open. 2018 Feb 8;6(2):e1654. doi: 10.1097/GOX.0000000000001654 (PMC5865927; doi:10.1097/gox.0000000000001654), 2018-02-08
Supplement: gox-6-e1654-s002.pdf [file gox-6-e1654-s002.pdf]

**SDC2. Influence of age, follow-up, reason for surgery and side of reconstruction, and complications on patient reported outcomes (univariate model)**

**Univariate model**

**mean ± SD**

| <i>BREAST-Q module</i>                             | <b>Q1</b>   | <b>Q3</b>    | <b>Q4</b>   | <b>Q6</b>    | <b>Q10</b>  | <b>Q11</b>   |
|----------------------------------------------------|-------------|--------------|-------------|--------------|-------------|--------------|
| <b>Age</b>                                         |             |              |             |              |             |              |
| • <i>≤ 42 years (n=81)</i>                         | 71.0 ± 19.0 | 81.5 ± 18.5  | 79.9 ± 20.9 | 81.2 ± 15.7  | 65.1 ± 38.1 | 82.2 ± 16.9  |
| • <i>&gt; 42 years (n=81)</i>                      | 69.2 ± 21.9 | 73.0 ± 21.9  | 78.7 ± 23.3 | 80.5 ± 18.2  | 61.1 ± 32.2 | 74.5 ± 22.5  |
| <b><i>p-value</i></b>                              | 0.067       | <b>0.001</b> | 0.304       | 0.694        | 0.816       | <b>0.003</b> |
| <b>Follow-up</b>                                   |             |              |             |              |             |              |
| • <i>&lt; 5 years (n=92)</i>                       | 70.9 ± 22.4 | 75.6 ± 22.8  | 77.1 ± 22.5 | 76.1 ± 17.2  | 65.6 ± 33.0 | 78.4 ± 23.0  |
| • <i>≥ 5 years (n=99)</i>                          | 69.9 ± 18.2 | 79.0 ± 18.3  | 81.3 ± 20.7 | 83.8 ± 15.4  | 64.4 ± 35.3 | 78.1 ± 18.0  |
| <b><i>p-value</i></b>                              | 0.719       | 0.259        | 0.184       | <b>0.002</b> | 0.890       | 0.934        |
| <b>Reason and side of surgery</b>                  |             |              |             |              |             |              |
| • <i>Prophylactic (uni- and bilateral) (n=104)</i> | 72.3 ± 20.2 | 80.1 ± 20.6  | 82.6 ± 21.3 | 82.6 ± 14.4  | 71.4 ± 35.6 | 81.0 ± 19.0  |
| • <i>Therapeutic unilateral (n=23)</i>             | 63.0 ± 20.4 | 69.5 ± 21.4  | 70.0 ± 24.3 | 74.2 ± 22.1  | 44.9 ± 27.0 | 70.3 ± 25.4  |
| • <i>Therapeutic bilateral (n=35)</i>              | 68.3 ± 20.7 | 73.9 ± 18.9  | 75.8 ± 21.0 | 80.3 ± 18.9  | 73.7 ± 33.3 | 76.6 ± 18.1  |

|                                         |             |              |              |             |              |              |
|-----------------------------------------|-------------|--------------|--------------|-------------|--------------|--------------|
| <i>p-value</i>                          | 0.124       | <b>0.045</b> | <b>0.027</b> | 0.096       | <b>0.011</b> | <b>0.060</b> |
| <b>Type of reconstruction</b>           |             |              |              |             |              |              |
| • <i>Implant + Alloderm (n=140)</i>     | 70.1 ± 20.7 | 75.8 ± 21.2  | 78.3 ± 22.2  | 80.1 ± 15.8 | 61.0 ± 34.0  | 77.3 ± 20.7  |
| • <i>Implant + Strattice (n=10)</i>     | 72.0 ± 14.4 | 88.9 ± 12.9  | 87.1 ± 19.1  | 86.1 ± 14.7 | /(100.0)     | 88.6 ± 14.0  |
| • <i>Implant + dermal grafts (n=12)</i> | 68.7 ± 23.1 | 84.3 ± 14.7  | 83.6 ± 20.9  | 85.3 ± 2.0  | 67.8 ± 43.1  | 83.7 ± 15.0  |
| <i>p-value</i>                          | 0.931       | 0.069        | 0.376        | 0.396       | 0.280        | 0.183        |
| <b>Complications</b>                    |             |              |              |             |              |              |
| • <i>No (n=192)</i>                     | 71.3 ± 19.3 | 79.3 ± 19.9  | 80.5 ± 21.0  | 80.3 ± 16.7 | 65.2 ± 33.3  | 79.2 ± 19.4  |
| • <i>Yes (n=16)</i>                     | 62.7 ± 27.9 | 62.6 ± 22.0  | 68.7 ± 27.5  | 82.7 ± 16.4 | 58.2 ± 33.7  | 66.4 ± 25.8  |
| <i>p-value</i>                          | 0.101       | <b>0.002</b> | <b>0.037</b> | 0.604       | 0.556        | <b>0.027</b> |
