# Supplementary material for: Patient-reported Outcomes after ADM-assisted Implant-based Breast Reconstruction: A Cross-sectional Study
Source: PubMed Central journal article supplement — Plast Reconstr Surg Glob Open. 2018 Feb 8;6(2):e1654. doi: 10.1097/GOX.0000000000001654 (PMC5865927; doi:10.1097/gox.0000000000001654), 2018-02-08
Supplement: gox-6-e1654-s003.pdf [file gox-6-e1654-s003.pdf]

**SDC3. Influence of age, follow-up, reason for surgery and side of reconstruction, and complications on patient reported outcomes (multivariate model)**

**Multivariate model**

Difference scores

| <i>BREAST-Q module</i>                           | Q1                   | p-value | Q3                   | p-value | Q4                     | p-value      | Q6                   | p-value      | Q10                    | p-value      | Q11                  | p-value |
|--------------------------------------------------|----------------------|---------|----------------------|---------|------------------------|--------------|----------------------|--------------|------------------------|--------------|----------------------|---------|
| <b>Constant value (ref)</b>                      | 75.5                 |         | 92.6                 |         | 77.8                   |              | 77.1                 |              | 88.9                   |              | 96.5                 |         |
| <b>Age in years</b>                              | 0.0<br>(-0.4, 0.3)   | 0.880   | -0.3<br>(-0.6, 0.0)  | 0.070   | 0.1<br>(-0.3, 0.4)     | 0.503        | 0.00<br>(-0.3, 0.3)  | 0.966        | -0.4<br>(-1.3, 0.6)    | 0.457        | -0.3<br>(-0.6, 0.0)  | 0.074   |
| <b>Follow-up in years</b>                        | -2.3<br>(-8.9, 4.7)  | 0.495   | 1.8<br>(-4.7, 8.3)   | 0.592   | 3.1<br>(-4.0, 10.1)    | 0.396        | 7.6<br>(2.1, 13.1)   | <b>0.007</b> | -0.9<br>(-18.8, 17.0)  | 0.921        | -2.9<br>(-9.5, 3.8)  | 0.395   |
| <b>Reason and side of surgery</b>                |                      |         |                      |         |                        |              |                      |              |                        |              |                      |         |
| • <i>Prophylactic (uni- + bilateral) (n=104)</i> | Ref                  |         | Ref                  |         | Ref                    |              | Ref                  |              | Ref                    |              | Ref                  |         |
| • <i>Therapeutic unilateral (n=23)</i>           | -9.4<br>(-18.9, 0.1) | 0.052   | -8.7<br>(-18.0, 0.5) | 0.063   | -12.7<br>(-22.7, -2.6) | <b>0.014</b> | -7.6<br>(-15.3, 0.2) | 0.056        | -26.2<br>(-45.6, -6.9) | <b>0.009</b> | -9.0<br>(-18.2, 0.3) | 0.057   |
| • <i>Therapeutic</i>                             | -3.4                 | 0.403   | -3.6                 | 0.375   | -6.5                   | 0.139        | -2.0                 | 0.562        | 3.5                    | 0.781        | -1.5                 | 0.728   |

| <i>bilateral (n=36)</i> | (-11.5, 4.7) |       | (-11.5, 4.3)  |              | (-15.1, 2.1) |       | (-8.8, 4.8)  |       | (-21.4, 28.3) |       | (-12.1, 5.9)  |              |
|-------------------------|--------------|-------|---------------|--------------|--------------|-------|--------------|-------|---------------|-------|---------------|--------------|
| <b>Complications</b>    | -8.7         | 0.118 | -14.2         | <b>0.009</b> | -10.7        | 0.139 | 4.4          | 0.339 | -8.0          | 0.524 | -12.1         | <b>0.040</b> |
|                         | (-19.6, 2.2) |       | (-24.8, -3.6) |              | (-22.3, 2.1) |       | (-4.7, 13.5) |       | (-33.0, 17.0) |       | (-23.7, -0.6) |              |
